# Supplementary material for: Small anion-assisted electrochemical potential splitting in a new series of bistriarylamine derivatives: organic mixed valency across a urea bridge and zwitterionization
Source: publisher site journal article supplement (doi:10.3762/bjoc.15.220), 2019-09-24
Supplement: Additional file 1 [file 1860-5397-15-220-S1.pdf]

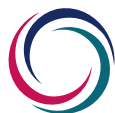

## Supporting Information

for

### **Small anion-assisted electrochemical potential splitting in a new series of bistriarylamine derivatives: organic mixed valency across a urea bridge and zwitterionization**

Keishiro Tahara, Tetsufumi Nakakita, Alyona A. Starikova, Takashi Ikeda, Masaaki Abe and Jun-ichi Kikuchi

*Beilstein J. Org. Chem.* **2019**, *15*, 2277–2286. [doi:10.3762/bjoc.15.220](https://doi.org/10.3762/bjoc.15.220)

**Copies of  $^1\text{H}$  NMR spectra of new compounds, DFT calculation data, and electrochemical data**

## **Contents**

1. Characterization of new compounds
2. DFT calculation
3. Electrochemical investigation

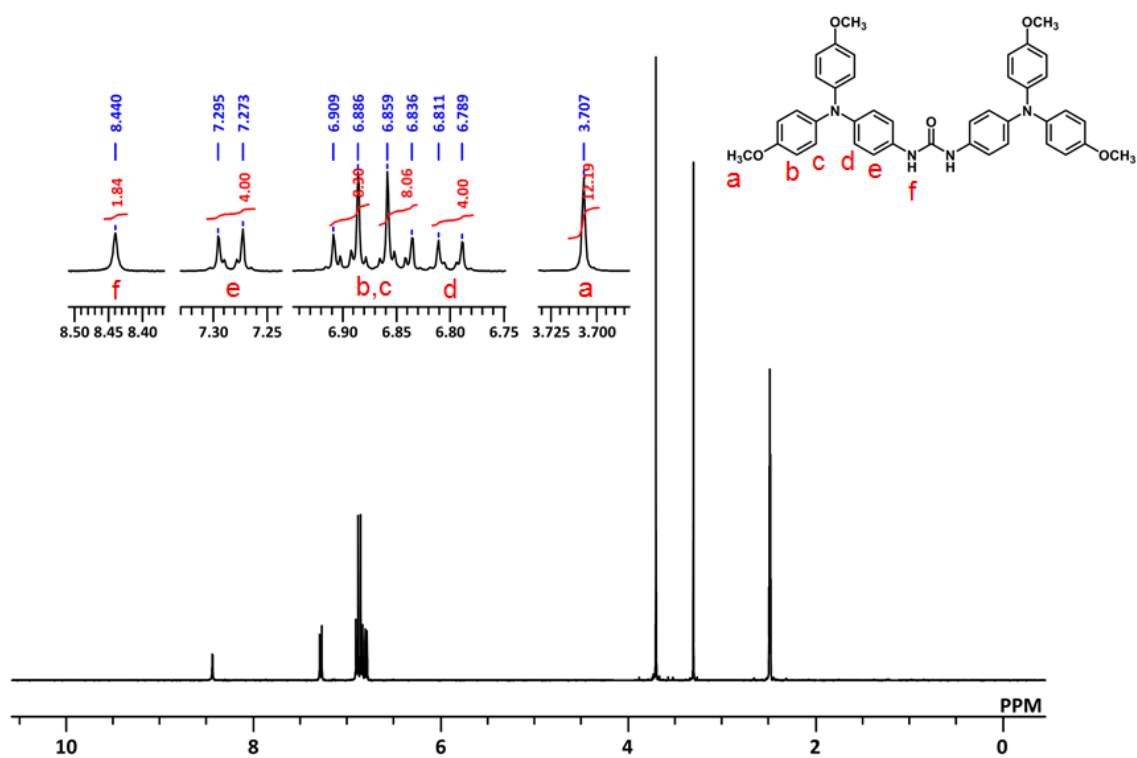

Figure S1:  $^1\text{H}$  NMR spectrum of **1a** in  $\text{DMSO-}d_6$  (400 MHz).

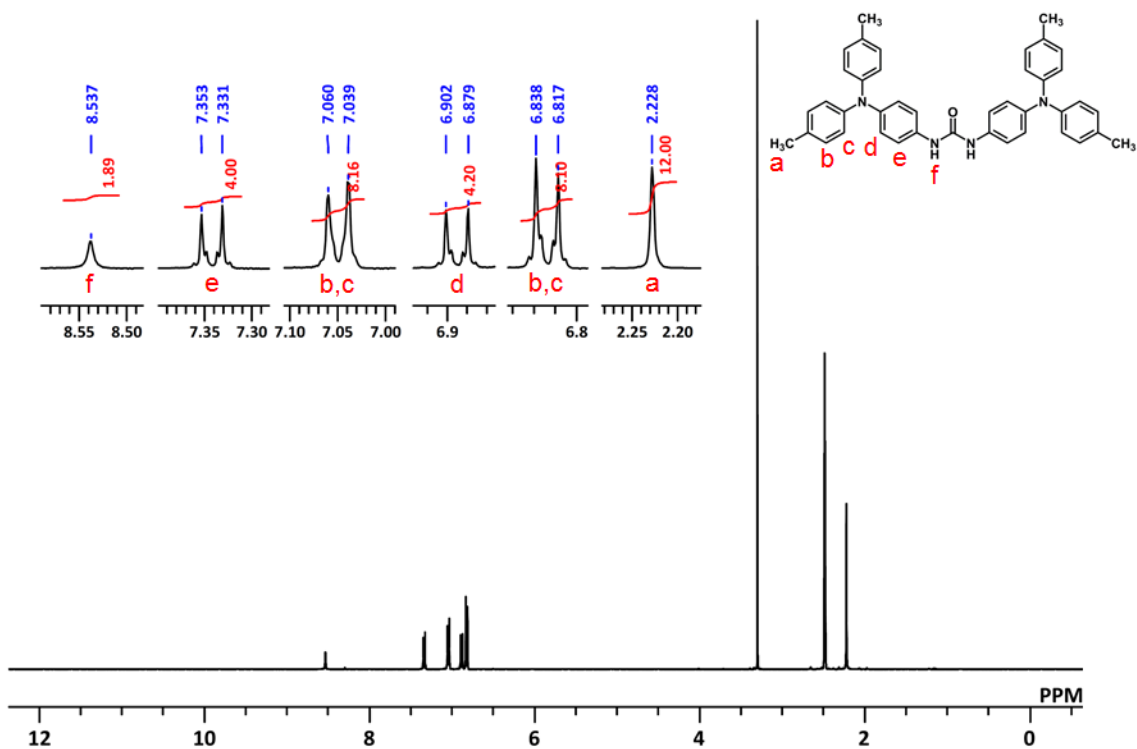

Figure S2:  $^1\text{H}$  NMR spectrum of **1b** in  $\text{DMSO-}d_6$  (400 MHz).

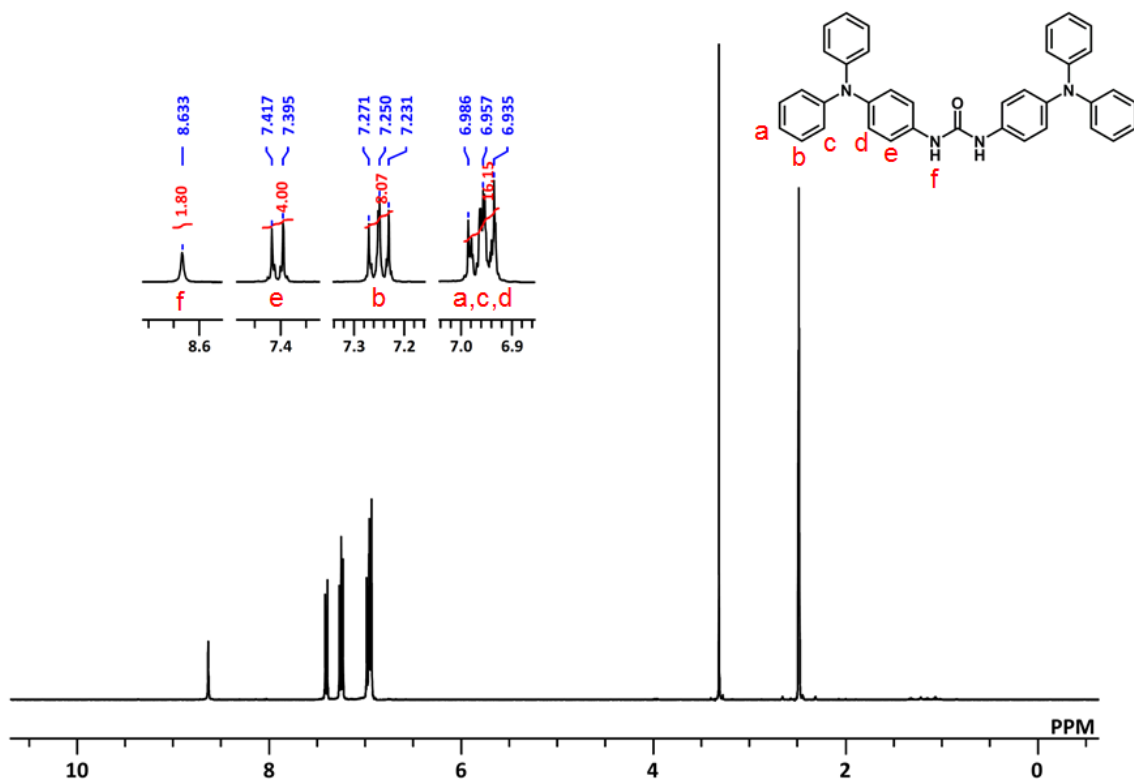

**Figure S3:** <sup>1</sup>H NMR spectrum of **Ph1b** in DMSO-*d*<sub>6</sub> (400 MHz).

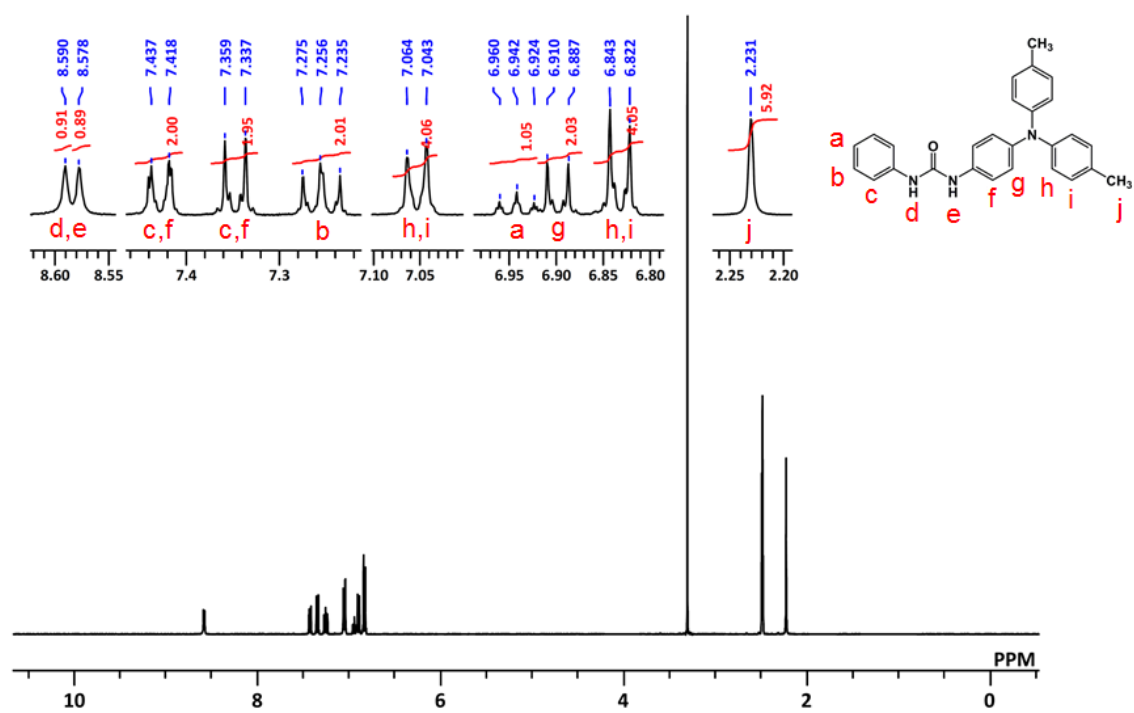

**Figure S4:** <sup>1</sup>H NMR spectrum of **1c** in DMSO-*d*<sub>6</sub> (400 MHz).

## 2. DFT calculation

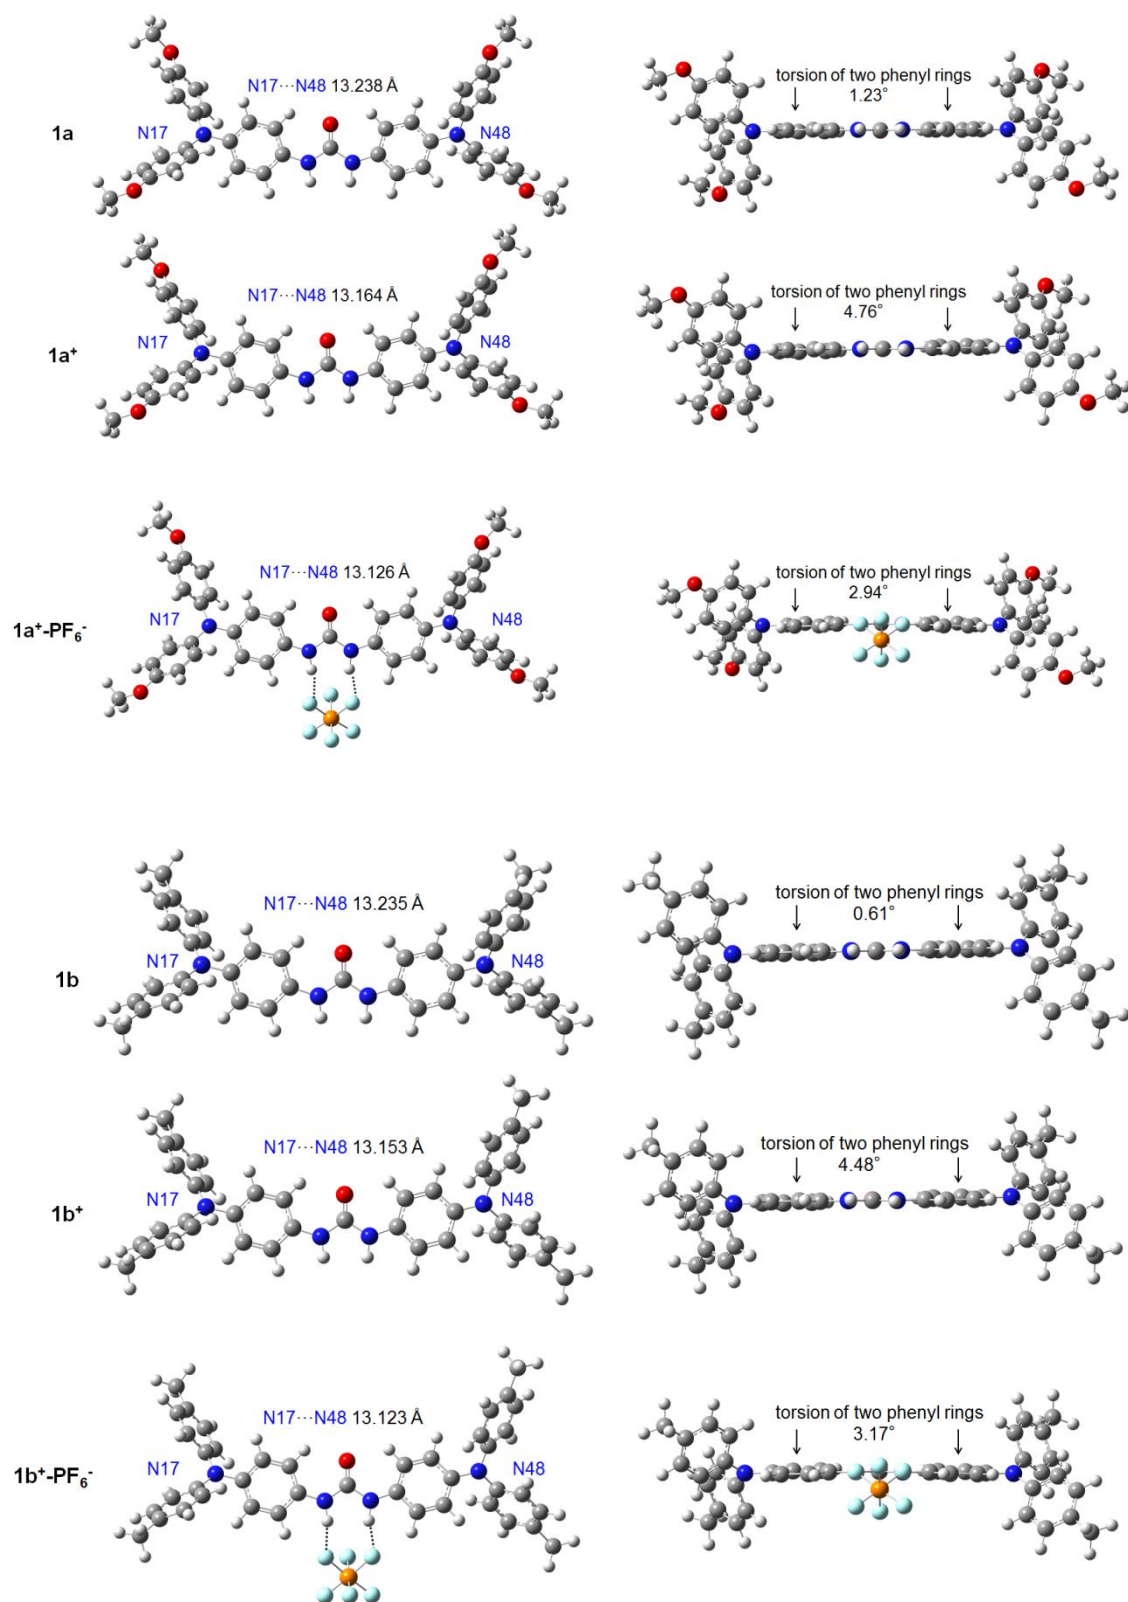

**Figure S5:** DFT-optimized structures of (top) **1a** and (bottom) **1b** and those in the MV state.

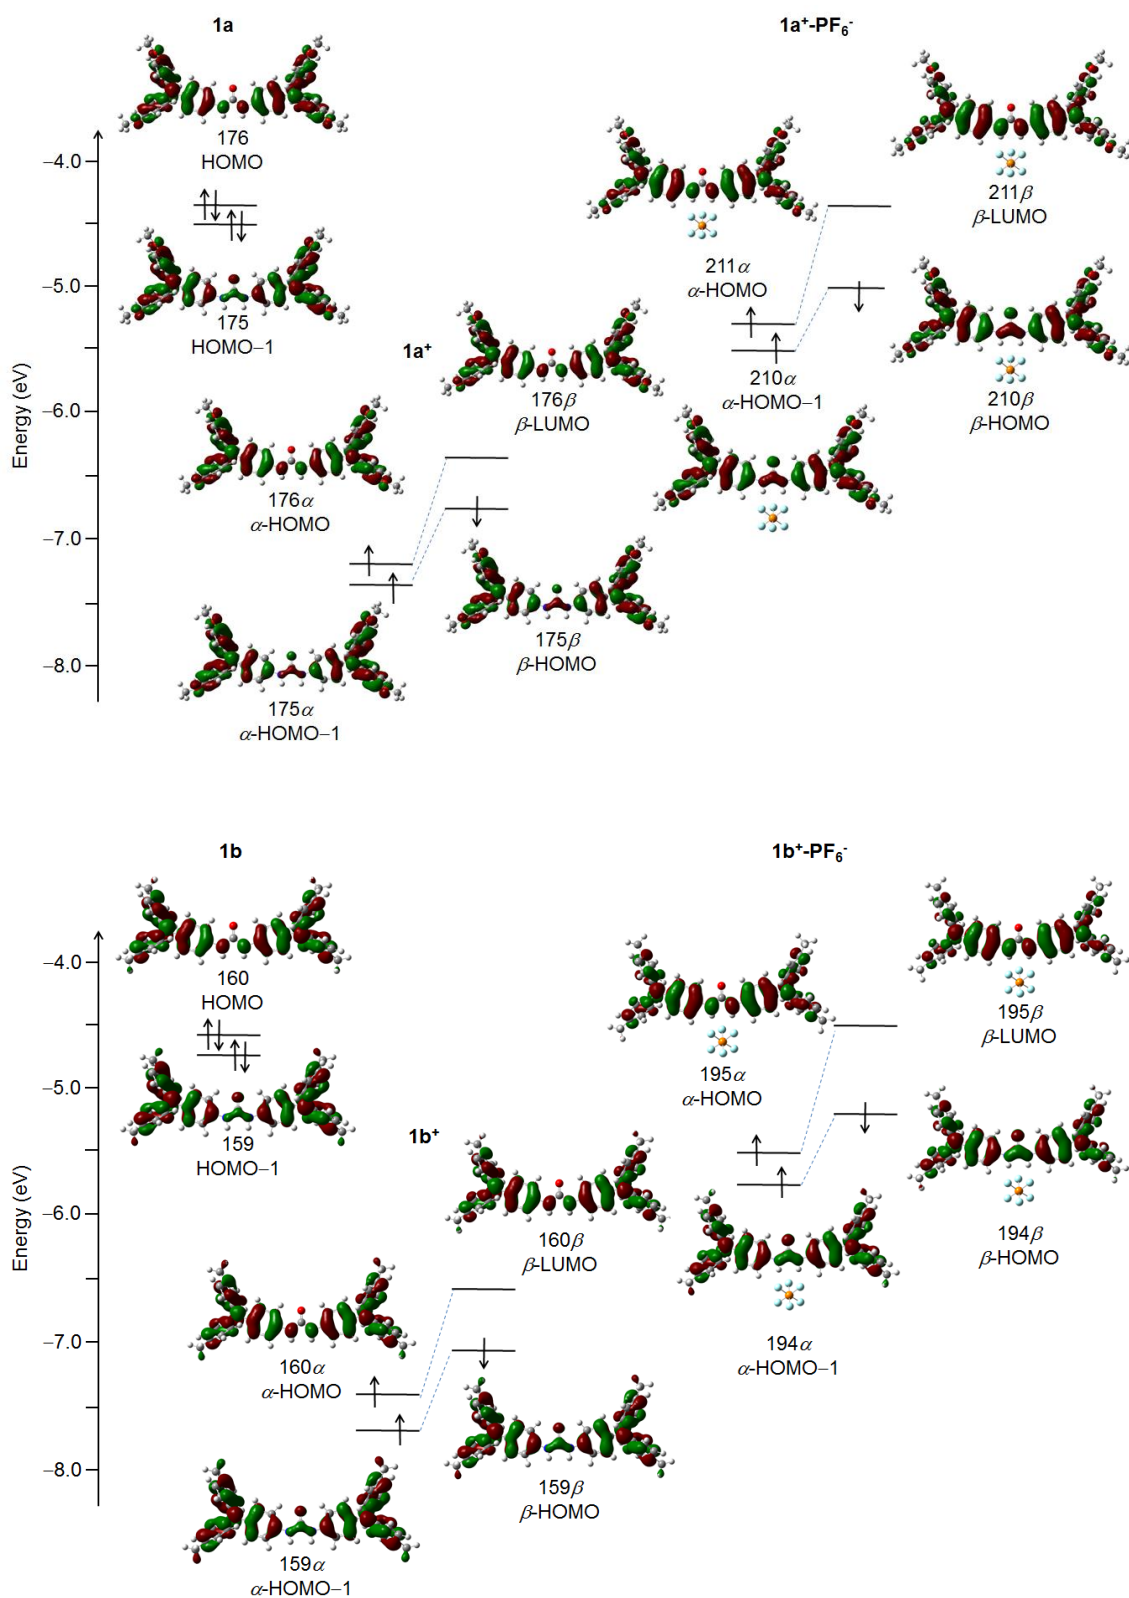

**Figure S6:** Selected molecular orbitals of (top) **1a** and (bottom) **1b** and those in the MV state.

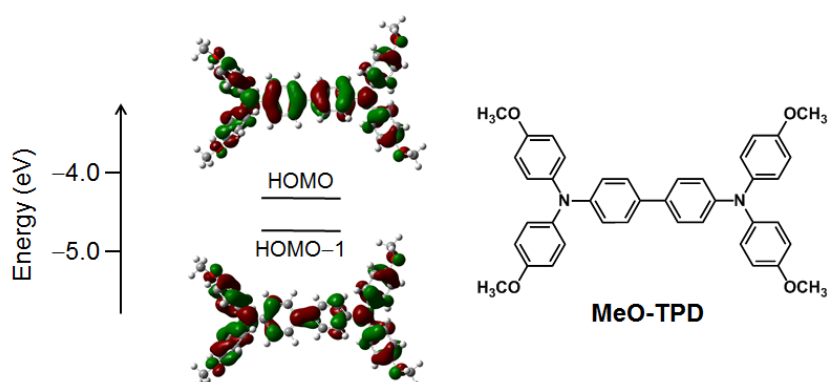

**Figure S7:** Chemical structure of MeO-TPD and its selected molecular orbitals.

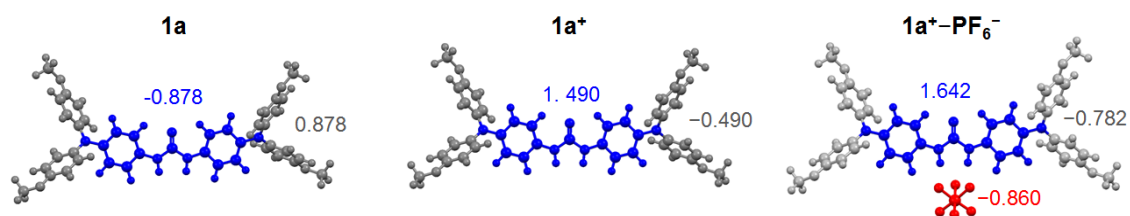

**Figure S8:** DFT-optimized structures with Mulliken charges of peripheral anisyl groups (gray), nitrogen centers and bridging moieties (blue), and  $\text{PF}_6^-$  (red).

**Table S1:** Coordinates of optimized gas-phase geometries of urea derivatives.

**1a** with the 6-31G(d) basis set

| Center Number | Atomic Number | Coordinates (Å) |           |           |
|---------------|---------------|-----------------|-----------|-----------|
|               |               | X               | Y         | Z         |
| 1             | 8             | 0.000015        | 0.444912  | -0.000003 |
| 2             | 7             | 1.151099        | -1.554559 | 0.019771  |
| 3             | 7             | -1.15114        | -1.554514 | -0.01933  |
| 4             | 6             | -0.000006       | -0.779383 | 0.000155  |
| 5             | 1             | 1.040931        | -2.558974 | 0.004804  |
| 6             | 1             | -1.041014       | -2.558931 | -0.004196 |
| 7             | 6             | -2.494951       | -1.123456 | -0.048043 |
| 8             | 6             | -3.488013       | -2.115328 | -0.049695 |
| 9             | 6             | -2.890872       | 0.222443  | -0.075858 |
| 10            | 6             | -4.836603       | -1.783705 | -0.087178 |
| 11            | 1             | -3.202102       | -3.166183 | -0.036366 |
| 12            | 1             | -2.140016       | 0.999483  | -0.067753 |
| 13            | 6             | -4.244581       | 0.547852  | -0.09129  |
| 14            | 6             | -5.242264       | -0.439494 | -0.102    |
| 15            | 1             | -5.583179       | -2.57104  | -0.101486 |
| 16            | 1             | -4.533434       | 1.594055  | -0.097566 |
| 17            | 7             | -6.617943       | -0.094431 | -0.127355 |
| 18            | 6             | -7.065973       | 1.005654  | -0.910913 |
| 19            | 6             | -7.554798       | -0.841899 | 0.638925  |
| 20            | 6             | -6.600247       | 1.191707  | -2.225294 |
| 21            | 6             | -7.98604        | 1.92658   | -0.396886 |
| 22            | 6             | -8.785877       | -1.226269 | 0.094805  |

|    |   |            |           |           |
|----|---|------------|-----------|-----------|
| 23 | 6 | -7.270236  | -1.207843 | 1.967396  |
| 24 | 1 | -5.889475  | 0.48603   | -2.643799 |
| 25 | 6 | -7.032644  | 2.267973  | -2.987121 |
| 26 | 6 | -8.443957  | 2.998381  | -1.166436 |
| 27 | 1 | -8.35432   | 1.802034  | 0.616657  |
| 28 | 1 | -9.022734  | -0.954013 | -0.929016 |
| 29 | 6 | -9.717587  | -1.944498 | 0.847838  |
| 30 | 6 | -8.181534  | -1.941516 | 2.713616  |
| 31 | 1 | -6.323684  | -0.913378 | 2.409665  |
| 32 | 1 | -6.671724  | 2.415004  | -4.000428 |
| 33 | 6 | -7.962878  | 3.179951  | -2.467484 |
| 34 | 1 | -9.159918  | 3.687782  | -0.733281 |
| 35 | 1 | -10.662019 | -2.219704 | 0.391815  |
| 36 | 6 | -9.416704  | -2.313671 | 2.163292  |
| 37 | 1 | -7.963366  | -2.225599 | 3.738554  |
| 38 | 6 | 2.494932   | -1.123556 | 0.048376  |
| 39 | 6 | 2.890922   | 0.222323  | 0.076041  |
| 40 | 6 | 3.487944   | -2.115484 | 0.05011   |
| 41 | 6 | 4.244652   | 0.547663  | 0.091401  |
| 42 | 1 | 2.140109   | 0.999404  | 0.067873  |
| 43 | 6 | 4.836548   | -1.783927 | 0.087529  |
| 44 | 1 | 3.201969   | -3.166324 | 0.036908  |
| 45 | 6 | 5.242279   | -0.439732 | 0.102181  |
| 46 | 1 | 4.533564   | 1.593851  | 0.097578  |
| 47 | 1 | 5.583093   | -2.57129  | 0.101916  |
| 48 | 7 | 6.617979   | -0.094751 | 0.127535  |
| 49 | 6 | 7.554782   | -0.842074 | -0.63894  |
| 50 | 6 | 7.065983   | 1.005401  | 0.91102   |
| 51 | 6 | 7.269964   | -1.208178 | -1.967322 |
| 52 | 6 | 8.786075   | -1.226152 | -0.09511  |
| 53 | 6 | 7.985824   | 1.926473  | 0.396891  |
| 54 | 6 | 6.600405   | 1.191354  | 2.225478  |
| 55 | 6 | 8.181224   | -1.941707 | -2.713718 |
| 56 | 1 | 6.323246   | -0.913923 | -2.409375 |
| 57 | 6 | 9.717753   | -1.944244 | -0.848324 |
| 58 | 1 | 9.023126   | -0.953796 | 0.928639  |
| 59 | 1 | 8.35398    | 1.802016  | -0.616708 |
| 60 | 6 | 8.443712   | 2.998329  | 1.166407  |
| 61 | 6 | 7.032762   | 2.267642  | 2.987273  |
| 62 | 1 | 5.889785   | 0.485558  | 2.644042  |
| 63 | 6 | 9.416627   | -2.31356  | -2.16368  |
| 64 | 1 | 7.962881   | -2.225914 | -3.738583 |
| 65 | 1 | 10.66236   | -2.219236 | -0.39254  |
| 66 | 1 | 9.159459   | 3.687873  | 0.733128  |
| 67 | 6 | 7.962807   | 3.179786  | 2.467527  |
| 68 | 1 | 6.671997   | 2.414622  | 4.000642  |
| 69 | 8 | -8.332794  | 4.197677  | -3.303791 |
| 70 | 8 | -10.246333 | -3.025323 | 2.986576  |
| 71 | 6 | -9.257861  | 5.154739  | -2.818154 |
| 72 | 1 | -8.867712  | 5.685547  | -1.939132 |
| 73 | 1 | -9.408225  | 5.867547  | -3.631317 |
| 74 | 1 | -10.220616 | 4.693143  | -2.55923  |
| 75 | 6 | -11.503255 | -3.432426 | 2.474954  |
| 76 | 1 | -11.391885 | -4.096387 | 1.606839  |



|    |   |            |           |           |
|----|---|------------|-----------|-----------|
| 77 | 1 | -11.995066 | -3.977183 | 3.283244  |
| 78 | 1 | -12.123392 | -2.57166  | 2.189445  |
| 79 | 8 | 8.332695   | 4.19749   | 3.303835  |
| 80 | 8 | 10.246187  | -3.025122 | -2.987087 |
| 81 | 6 | 9.258033   | 5.154362  | 2.818419  |
| 82 | 1 | 8.867958   | 5.68562   | 1.939629  |
| 83 | 1 | 9.408791   | 5.866864  | 3.63178   |
| 84 | 1 | 10.220571  | 4.692489  | 2.559168  |
| 85 | 6 | 11.50365   | -3.431178 | -2.476025 |
| 86 | 1 | 11.393192  | -4.095295 | -1.607887 |
| 87 | 1 | 11.995606  | -3.975483 | -3.28453  |
| 88 | 1 | 12.123153  | -2.5699   | -2.190686 |

**1a<sup>+</sup> with the 6-311++G(d,p) basis set**

| Center Number | Atomic Number | Coordinates (Å) |           |           |
|---------------|---------------|-----------------|-----------|-----------|
|               |               | X               | Y         | Z         |
| 1             | 8             | -0.000018       | 0.421377  | -0.000548 |
| 2             | 7             | -1.151882       | -1.571501 | -0.000461 |
| 3             | 7             | 1.151951        | -1.57144  | -0.00053  |
| 4             | 6             | 0.000014        | -0.793894 | -0.000522 |
| 5             | 1             | -1.04071        | -2.573831 | 0.040025  |
| 6             | 1             | 1.040834        | -2.573779 | -0.040918 |
| 7             | 6             | 2.484782        | -1.138603 | 0.024813  |
| 8             | 6             | 3.483561        | -2.1288   | -0.007899 |
| 9             | 6             | 2.87349         | 0.210455  | 0.08441   |
| 10            | 6             | 4.823389        | -1.794195 | 0.019655  |
| 11            | 1             | 3.202909        | -3.177273 | -0.039723 |
| 12            | 1             | 2.122467        | 0.984309  | 0.093175  |
| 13            | 6             | 4.218189        | 0.54151   | 0.109886  |
| 14            | 6             | 5.220336        | -0.444618 | 0.079745  |
| 15            | 1             | 5.571461        | -2.576264 | 0.009973  |
| 16            | 1             | 4.500646        | 1.586096  | 0.139893  |
| 17            | 7             | 6.581212        | -0.095614 | 0.111745  |
| 18            | 6             | 7.017687        | 1.032581  | 0.857597  |
| 19            | 6             | 7.537168        | -0.866345 | -0.604492 |
| 20            | 6             | 6.529094        | 1.266463  | 2.155558  |
| 21            | 6             | 7.951613        | 1.92313   | 0.317222  |
| 22            | 6             | 8.753871        | -1.219036 | -0.01119  |
| 23            | 6             | 7.282014        | -1.274675 | -1.925643 |
| 24            | 1             | 5.819275        | 0.57607   | 2.594525  |
| 25            | 6             | 6.957558        | 2.36212   | 2.879844  |
| 26            | 6             | 8.392418        | 3.024062  | 1.044225  |
| 27            | 1             | 8.331493        | 1.758404  | -0.683634 |
| 28            | 1             | 8.96043         | -0.913887 | 1.007325  |
| 29            | 6             | 9.699625        | -1.963006 | -0.709327 |
| 30            | 6             | 8.21463         | -2.019257 | -2.622168 |
| 31            | 1             | 6.352588        | -0.99117  | -2.404292 |
| 32            | 1             | 6.594062        | 2.544148  | 3.883639  |
| 33            | 6             | 7.894325        | 3.254782  | 2.333047  |
| 34            | 1             | 9.108587        | 3.697999  | 0.594557  |
| 35            | 1             | 10.627326       | -2.226031 | -0.220043 |
| 36            | 6             | 9.43447         | -2.373246 | -2.022288 |
| 37            | 1             | 8.031972        | -2.328034 | -3.64405  |

|    |   |            |           |           |
|----|---|------------|-----------|-----------|
| 38 | 6 | -2.484737  | -1.138733 | -0.025653 |
| 39 | 6 | -2.873523  | 0.210295  | -0.085405 |
| 40 | 6 | -3.483465  | -2.128974 | 0.007392  |
| 41 | 6 | -4.218242  | 0.541284  | -0.110652 |
| 42 | 1 | -2.12254   | 0.984184  | -0.094445 |
| 43 | 6 | -4.823313  | -1.794435 | -0.019932 |
| 44 | 1 | -3.202758  | -3.177429 | 0.039312  |
| 45 | 6 | -5.22034   | -0.444882 | -0.080113 |
| 46 | 1 | -4.500756  | 1.585852  | -0.140779 |
| 47 | 1 | -5.571344  | -2.576538 | -0.00999  |
| 48 | 7 | -6.581228  | -0.095933 | -0.111847 |
| 49 | 6 | -7.537042  | -0.866489 | 0.604718  |
| 50 | 6 | -7.017831  | 1.032227  | -0.857734 |
| 51 | 6 | -7.281442  | -1.275029 | 1.925728  |
| 52 | 6 | -8.754112  | -1.218796 | 0.011918  |
| 53 | 6 | -7.951232  | 1.923128  | -0.317063 |
| 54 | 6 | -6.529851  | 1.265666  | -2.155993 |
| 55 | 6 | -8.213957  | -2.019428 | 2.622579  |
| 56 | 1 | -6.351745  | -0.991817 | 2.404022  |
| 57 | 6 | -9.699769  | -1.962564 | 0.710394  |
| 58 | 1 | -8.961034  | -0.913503 | -1.006478 |
| 59 | 1 | -8.330632  | 1.758723  | 0.684029  |
| 60 | 6 | -8.392136  | 3.024009  | -1.044091 |
| 61 | 6 | -6.958421  | 2.361261  | -2.880318 |
| 62 | 1 | -5.820427  | 0.574988  | -2.595153 |
| 63 | 6 | -9.434162  | -2.373012 | 2.023199  |
| 64 | 1 | -8.030941  | -2.328354 | 3.644351  |
| 65 | 1 | -10.627756 | -2.22528  | 0.221487  |
| 66 | 1 | -9.107894  | 3.698236  | -0.594203 |
| 67 | 6 | -7.894669  | 3.254287  | -2.333233 |
| 68 | 1 | -6.595404  | 2.542963  | -3.884346 |
| 69 | 8 | 8.250191   | 4.293148  | 3.123726  |
| 70 | 8 | 10.278281  | -3.10127  | -2.789408 |
| 71 | 6 | 9.202538   | 5.240055  | 2.640393  |
| 72 | 1 | 8.833962   | 5.747398  | 1.74363   |
| 73 | 1 | 9.328166   | 5.965122  | 3.44145   |
| 74 | 1 | 10.162937  | 4.760245  | 2.428534  |
| 75 | 6 | 11.541039  | -3.495713 | -2.253582 |
| 76 | 1 | 11.414298  | -4.137878 | -1.376621 |
| 77 | 1 | 12.033432  | -4.056344 | -3.045079 |
| 78 | 1 | 12.148691  | -2.624057 | -1.991894 |
| 79 | 8 | -8.250698  | 4.292555  | -3.123973 |
| 80 | 8 | -10.277846 | -3.100865 | 2.79062   |
| 81 | 6 | -9.202556  | 5.239808  | -2.640359 |
| 82 | 1 | -8.833371  | 5.74729   | -1.743924 |
| 83 | 1 | -9.328451  | 5.964705  | -3.441528 |
| 84 | 1 | -10.162954 | 4.76028   | -2.427854 |
| 85 | 6 | -11.540993 | -3.49481  | 2.255344  |
| 86 | 1 | -11.414891 | -4.13694  | 1.378265  |
| 87 | 1 | -12.033218 | -4.055337 | 3.047018  |
| 88 | 1 | -12.148451 | -2.62291  | 1.994018  |

$1a^+-PF_6^-$  with the 6-311++G(d,p) basis set

| Center<br>Number | Atomic<br>Number | Coordinates (Å) |           |           |
|------------------|------------------|-----------------|-----------|-----------|
|                  |                  | X               | Y         | Z         |
| 1                | 8                | 0.001848        | 1.340148  | 0.143598  |
| 2                | 7                | 1.140555        | -0.663576 | 0.266274  |
| 3                | 7                | -1.147761       | -0.658312 | 0.248675  |
| 4                | 6                | -0.001429       | 0.120834  | 0.21162   |
| 5                | 1                | 1.026178        | -1.676588 | 0.308231  |
| 6                | 1                | -1.038772       | -1.671315 | 0.303557  |
| 7                | 6                | -2.463613       | -0.230157 | 0.177298  |
| 8                | 6                | -3.461892       | -1.231669 | 0.183173  |
| 9                | 6                | -2.861758       | 1.121035  | 0.099707  |
| 10               | 6                | -4.796802       | -0.899969 | 0.112771  |
| 11               | 1                | -3.164317       | -2.273011 | 0.224287  |
| 12               | 1                | -2.111458       | 1.895778  | 0.107801  |
| 13               | 6                | -4.204173       | 1.444262  | 0.030393  |
| 14               | 6                | -5.202082       | 0.449584  | 0.033394  |
| 15               | 1                | -5.540102       | -1.686484 | 0.099348  |
| 16               | 1                | -4.492319       | 2.486882  | -0.013095 |
| 17               | 7                | -6.560203       | 0.788257  | -0.041886 |
| 18               | 6                | -6.982177       | 1.943797  | -0.758768 |
| 19               | 6                | -7.543906       | -0.022258 | 0.594758  |
| 20               | 6                | -6.477849       | 2.214576  | -2.041552 |
| 21               | 6                | -7.918777       | 2.819992  | -0.206073 |
| 22               | 6                | -8.705677       | -0.395011 | -0.084378 |
| 23               | 6                | -7.36759        | -0.451415 | 1.920284  |
| 24               | 1                | -5.760236       | 1.537152  | -2.488175 |
| 25               | 6                | -6.893619       | 3.334708  | -2.739291 |
| 26               | 6                | -8.350162       | 3.943845  | -0.907846 |
| 27               | 1                | -8.315056       | 2.624059  | 0.782891  |
| 28               | 1                | -8.852302       | -0.074154 | -1.108631 |
| 29               | 6                | -9.677133       | -1.178331 | 0.535149  |
| 30               | 6                | -8.323337       | -1.238161 | 2.53825   |
| 31               | 1                | -6.475138       | -0.16232  | 2.461952  |
| 32               | 1                | -6.512082       | 3.545973  | -3.730764 |
| 33               | 6                | -7.834814       | 4.210785  | -2.180164 |
| 34               | 1                | -9.073448       | 4.603524  | -0.448117 |
| 35               | 1                | -10.561963      | -1.454767 | -0.02186  |
| 36               | 6                | -9.488489       | -1.609585 | 1.852234  |
| 37               | 1                | -8.194143       | -1.571331 | 3.560715  |
| 38               | 6                | 2.459539        | -0.239936 | 0.236912  |
| 39               | 6                | 2.864688        | 1.110047  | 0.176812  |
| 40               | 6                | 3.453675        | -1.244944 | 0.270667  |
| 41               | 6                | 4.209697        | 1.428695  | 0.148399  |
| 42               | 1                | 2.116947        | 1.886187  | 0.135071  |
| 43               | 6                | 4.79127         | -0.917754 | 0.243642  |
| 44               | 1                | 3.151737        | -2.284148 | 0.329828  |
| 45               | 6                | 5.20373         | 0.430554  | 0.180504  |
| 46               | 1                | 4.502028        | 2.469011  | 0.083541  |
| 47               | 1                | 5.532131        | -1.705606 | 0.284294  |
| 48               | 7                | 6.564634        | 0.764352  | 0.14878   |
| 49               | 6                | 7.509633        | -0.107667 | -0.465148 |
| 50               | 6                | 7.028127        | 1.980744  | 0.725933  |
| 51               | 6                | 7.256317        | -0.659584 | -1.731526 |
| 52               | 6                | 8.709607        | -0.419603 | 0.177211  |

|    |    |            |           |           |
|----|----|------------|-----------|-----------|
| 53 | 6  | 7.927021   | 2.79716   | 0.036217  |
| 54 | 6  | 6.603471   | 2.373479  | 2.005896  |
| 55 | 6  | 8.175155   | -1.505419 | -2.326898 |
| 56 | 1  | 6.333289   | -0.419876 | -2.245315 |
| 57 | 6  | 9.644141   | -1.262098 | -0.421131 |
| 58 | 1  | 8.915752   | -0.003723 | 1.156039  |
| 59 | 1  | 8.261823   | 2.507013  | -0.952311 |
| 60 | 6  | 8.398536   | 3.980731  | 0.600557  |
| 61 | 6  | 7.059255   | 3.552939  | 2.567753  |
| 62 | 1  | 5.915878   | 1.744031  | 2.557609  |
| 63 | 6  | 9.379129   | -1.815109 | -1.678231 |
| 64 | 1  | 7.986131   | -1.933658 | -3.303607 |
| 65 | 1  | 10.560658  | -1.488046 | 0.106654  |
| 66 | 1  | 9.090509   | 4.591387  | 0.036704  |
| 67 | 6  | 7.962237   | 4.368692  | 1.871259  |
| 68 | 1  | 6.739186   | 3.858665  | 3.556354  |
| 69 | 8  | -8.181766  | 5.279008  | -2.948437 |
| 70 | 8  | -10.367027 | -2.379698 | 2.54842   |
| 71 | 6  | -9.128582  | 6.210434  | -2.438129 |
| 72 | 1  | -8.765658  | 6.68484   | -1.520285 |
| 73 | 1  | -9.247231  | 6.966268  | -3.212259 |
| 74 | 1  | -10.094999 | 5.731997  | -2.246901 |
| 75 | 6  | -11.556181 | -2.818541 | 1.901302  |
| 76 | 1  | -11.327895 | -3.43505  | 1.025706  |
| 77 | 1  | -12.08868  | -3.418891 | 2.636524  |
| 78 | 1  | -12.18275  | -1.971679 | 1.601788  |
| 79 | 8  | 8.353635   | 5.503489  | 2.512243  |
| 80 | 8  | 10.216462  | -2.650915 | -2.348717 |
| 81 | 6  | 9.264305   | 6.379589  | 1.858205  |
| 82 | 1  | 8.843657   | 6.766202  | 0.92398   |
| 83 | 1  | 9.428776   | 7.204859  | 2.548508  |
| 84 | 1  | 10.218278  | 5.882219  | 1.653307  |
| 85 | 6  | 11.442024  | -3.031888 | -1.733903 |
| 86 | 1  | 11.266382  | -3.562079 | -0.792109 |
| 87 | 1  | 11.931096  | -3.701264 | -2.439074 |
| 88 | 1  | 12.084142  | -2.163298 | -1.55292  |
| 89 | 15 | -0.012822  | -4.454291 | -0.212164 |
| 90 | 9  | -1.170686  | -3.497744 | 0.553768  |
| 91 | 9  | 1.147165   | -3.504871 | 0.559282  |
| 92 | 9  | -0.006617  | -3.342336 | -1.429619 |
| 93 | 9  | 1.157514   | -5.298647 | -0.941388 |
| 94 | 9  | -1.184977  | -5.291386 | -0.94692  |
| 95 | 9  | -0.018908  | -5.452792 | 1.060418  |

**1b** with the 6-31G(d) basis set

| Center<br>Number | Atomic<br>Number | Coordinates (Å) |           |           |
|------------------|------------------|-----------------|-----------|-----------|
|                  |                  | X               | Y         | Z         |
| 1                | 8                | 0.000013        | 0.533691  | -0.000079 |
| 2                | 7                | -1.151396       | -1.465557 | -0.014383 |
| 3                | 7                | 1.151422        | -1.465555 | 0.014223  |
| 4                | 6                | 0.000012        | -0.690226 | -0.000069 |
| 5                | 1                | -1.041351       | -2.470073 | -0.003104 |
| 6                | 1                | 1.041378        | -2.470072 | 0.003008  |

|    |   |           |           |           |
|----|---|-----------|-----------|-----------|
| 7  | 6 | 2.494547  | -1.033935 | 0.039814  |
| 8  | 6 | 3.48746   | -2.026429 | 0.046136  |
| 9  | 6 | 2.888583  | 0.312861  | 0.059518  |
| 10 | 6 | 4.835761  | -1.693181 | 0.080911  |
| 11 | 1 | 3.201361  | -3.077192 | 0.039024  |
| 12 | 1 | 2.137004  | 1.089042  | 0.047907  |
| 13 | 6 | 4.242366  | 0.638368  | 0.072338  |
| 14 | 6 | 5.238285  | -0.349075 | 0.088154  |
| 15 | 1 | 5.584583  | -2.478467 | 0.098187  |
| 16 | 1 | 4.532961  | 1.684233  | 0.07376   |
| 17 | 7 | 6.616716  | -0.001338 | 0.112243  |
| 18 | 6 | 7.068385  | 1.040322  | 0.967063  |
| 19 | 6 | 7.535206  | -0.695704 | -0.719504 |
| 20 | 6 | 6.569686  | 1.164088  | 2.273401  |
| 21 | 6 | 8.023287  | 1.969669  | 0.526186  |
| 22 | 6 | 8.806456  | -1.056937 | -0.245582 |
| 23 | 6 | 7.193339  | -1.038099 | -2.037545 |
| 24 | 1 | 5.838348  | 0.448496  | 2.635777  |
| 25 | 6 | 7.008756  | 2.193264  | 3.102275  |
| 26 | 6 | 8.46668   | 2.981902  | 1.3739    |
| 27 | 1 | 8.419178  | 1.89189   | -0.481489 |
| 28 | 1 | 9.090386  | -0.801198 | 0.770397  |
| 29 | 6 | 9.702778  | -1.730871 | -1.0713   |
| 30 | 6 | 8.093929  | -1.728804 | -2.84451  |
| 31 | 1 | 6.220198  | -0.756005 | -2.427026 |
| 32 | 1 | 6.607262  | 2.264791  | 4.111036  |
| 33 | 6 | 7.965937  | 3.122877  | 2.674681  |
| 34 | 1 | 9.209927  | 3.687217  | 1.007913  |
| 35 | 1 | 10.68288  | -1.9948   | -0.679224 |
| 36 | 6 | 9.366671  | -2.089534 | -2.383447 |
| 37 | 1 | 7.804236  | -1.977747 | -3.863414 |
| 38 | 6 | -2.494526 | -1.033943 | -0.039907 |
| 39 | 6 | -2.888571 | 0.312848  | -0.059789 |
| 40 | 6 | -3.487435 | -2.026442 | -0.046004 |
| 41 | 6 | -4.242357 | 0.638346  | -0.072551 |
| 42 | 1 | -2.136996 | 1.089035  | -0.048352 |
| 43 | 6 | -4.83574  | -1.693207 | -0.080729 |
| 44 | 1 | -3.20133  | -3.077203 | -0.038757 |
| 45 | 6 | -5.238272 | -0.349104 | -0.088134 |
| 46 | 1 | -4.532957 | 1.684209  | -0.074117 |
| 47 | 1 | -5.584558 | -2.4785   | -0.097837 |
| 48 | 7 | -6.616704 | -0.001369 | -0.112191 |
| 49 | 6 | -7.535169 | -0.695624 | 0.719675  |
| 50 | 6 | -7.068411 | 1.040156  | -0.967158 |
| 51 | 6 | -7.193262 | -1.037868 | 2.037746  |
| 52 | 6 | -8.80645  | -1.056881 | 0.245851  |
| 53 | 6 | -8.023251 | 1.969613  | -0.526351 |
| 54 | 6 | -6.569808 | 1.163692  | -2.273543 |
| 55 | 6 | -8.09384  | -1.728453 | 2.844829  |
| 56 | 1 | -6.220103 | -0.755749 | 2.427161  |
| 57 | 6 | -9.702755 | -1.730694 | 1.071684  |
| 58 | 1 | -9.090418 | -0.801261 | -0.770148 |
| 59 | 1 | -8.419059 | 1.892006  | 0.48137   |
| 60 | 6 | -8.466677 | 2.981715  | -1.374189 |

|    |   |            |           |           |
|----|---|------------|-----------|-----------|
| 61 | 6 | -7.008913  | 2.192756  | -3.102555 |
| 62 | 1 | -5.838517  | 0.448022  | -2.635859 |
| 63 | 6 | -9.366608  | -2.08921  | 2.38386   |
| 64 | 1 | -7.804112  | -1.977278 | 3.863751  |
| 65 | 1 | -10.68288  | -1.994645 | 0.679675  |
| 66 | 1 | -9.209872  | 3.687116  | -1.008257 |
| 67 | 6 | -7.966028  | 3.122459  | -2.675041 |
| 68 | 1 | -6.607494  | 2.264112  | -4.111357 |
| 69 | 6 | -10.329291 | -2.857247 | 3.259035  |
| 70 | 1 | -10.215671 | -3.942299 | 3.128194  |
| 71 | 1 | -10.165127 | -2.641479 | 4.320502  |
| 72 | 1 | -11.370542 | -2.611594 | 3.023182  |
| 73 | 6 | -8.419556  | 4.249339  | -3.57337  |
| 74 | 1 | -9.443782  | 4.56068   | -3.341019 |
| 75 | 1 | -7.778829  | 5.135031  | -3.462985 |
| 76 | 1 | -8.387585  | 3.958275  | -4.629158 |
| 77 | 6 | 10.329364  | -2.857706 | -3.258493 |
| 78 | 1 | 10.215557  | -3.942742 | -3.127686 |
| 79 | 1 | 10.165388  | -2.641898 | -4.319981 |
| 80 | 1 | 11.370618  | -2.612214 | -3.022484 |
| 81 | 6 | 8.419409   | 4.249868  | 3.572898  |
| 82 | 1 | 9.442933   | 4.562515  | 3.339233  |
| 83 | 1 | 7.777469   | 5.134847  | 3.463856  |
| 84 | 1 | 8.389284   | 3.95828   | 4.628602  |

**1b<sup>+</sup> with the 6-311++G(d,p) basis set**

| Center Number | Atomic Number | Coordinates (Å) |           |           |
|---------------|---------------|-----------------|-----------|-----------|
|               |               | X               | Y         | Z         |
| 1             | 8             | -0.000026       | 0.505659  | -0.001845 |
| 2             | 7             | -1.151891       | -1.487517 | 0.004804  |
| 3             | 7             | 1.152080        | -1.487394 | -0.008919 |
| 4             | 6             | 0.000051        | -0.709032 | -0.001980 |
| 5             | 1             | -1.040438       | -2.490126 | 0.042871  |
| 6             | 1             | 1.040729        | -2.490007 | -0.047185 |
| 7             | 6             | 2.483172        | -1.054610 | 0.012355  |
| 8             | 6             | 3.482874        | -2.045353 | -0.018736 |
| 9             | 6             | 2.871391        | 0.295814  | 0.066728  |
| 10            | 6             | 4.821544        | -1.710598 | 0.005634  |
| 11            | 1             | 3.202307        | -3.093939 | -0.045529 |
| 12            | 1             | 2.120126        | 1.069392  | 0.072380  |
| 13            | 6             | 4.214708        | 0.627287  | 0.091863  |
| 14            | 6             | 5.218659        | -0.359279 | 0.063680  |
| 15            | 1             | 5.569857        | -2.492196 | -0.001319 |
| 16            | 1             | 4.496900        | 1.671823  | 0.118074  |
| 17            | 7             | 6.575649        | -0.009758 | 0.096904  |
| 18            | 6             | 7.009304        | 1.135404  | 0.823544  |
| 19            | 6             | 7.541510        | -0.795354 | -0.594094 |
| 20            | 6             | 6.522778        | 1.387647  | 2.113016  |
| 21            | 6             | 7.945011        | 2.015360  | 0.262610  |
| 22            | 6             | 8.753214        | -1.130008 | 0.024813  |
| 23            | 6             | 7.302988        | -1.225357 | -1.906288 |
| 24            | 1             | 5.818483        | 0.700953  | 2.566814  |
| 25            | 6             | 6.958842        | 2.503942  | 2.815781  |

|    |   |            |           |           |
|----|---|------------|-----------|-----------|
| 26 | 6 | 8.373954   | 3.123789  | 0.980009  |
| 27 | 1 | 8.327388   | 1.829490  | -0.733631 |
| 28 | 1 | 8.947404   | -0.801057 | 1.038366  |
| 29 | 6 | 9.698311   | -1.883620 | -0.658848 |
| 30 | 6 | 8.257208   | -1.981753 | -2.574925 |
| 31 | 1 | 6.381255   | -0.948170 | -2.403562 |
| 32 | 1 | 6.581338   | 2.676072  | 3.818029  |
| 33 | 6 | 7.888941   | 3.395785  | 2.266814  |
| 34 | 1 | 9.094717   | 3.796864  | 0.527903  |
| 35 | 1 | 10.629305  | -2.136773 | -0.163020 |
| 36 | 6 | 9.471199   | -2.329377 | -1.967859 |
| 37 | 1 | 8.062789   | -2.292838 | -3.595852 |
| 38 | 6 | -2.483028  | -1.054830 | -0.015703 |
| 39 | 6 | -2.871365  | 0.295557  | -0.070106 |
| 40 | 6 | -3.482643  | -2.045629 | 0.016340  |
| 41 | 6 | -4.214722  | 0.626950  | -0.094243 |
| 42 | 1 | -2.120149  | 1.069180  | -0.076455 |
| 43 | 6 | -4.821349  | -1.710956 | -0.007042 |
| 44 | 1 | -3.201989  | -3.094191 | 0.043189  |
| 45 | 6 | -5.218592  | -0.359668 | -0.065011 |
| 46 | 1 | -4.496992  | 1.671465  | -0.120436 |
| 47 | 1 | -5.569617  | -2.492591 | 0.000698  |
| 48 | 7 | -6.575642  | -0.010276 | -0.097063 |
| 49 | 6 | -7.540753  | -0.795770 | 0.595111  |
| 50 | 6 | -7.010101  | 1.134764  | -0.823415 |
| 51 | 6 | -7.300956  | -1.225261 | 1.907229  |
| 52 | 6 | -8.752975  | -1.130831 | -0.022573 |
| 53 | 6 | -7.945334  | 2.014710  | -0.261658 |
| 54 | 6 | -6.524872  | 1.386897  | -2.113392 |
| 55 | 6 | -8.254455  | -1.981560 | 2.577020  |
| 56 | 1 | -6.378801  | -0.947771 | 2.403548  |
| 57 | 6 | -9.697315  | -1.884354 | 0.662215  |
| 58 | 1 | -8.948129  | -0.802260 | -1.036066 |
| 59 | 1 | -8.326721  | 1.828917  | 0.734975  |
| 60 | 6 | -8.375064  | 3.123023  | -0.978750 |
| 61 | 6 | -6.961713  | 2.503092  | -2.815851 |
| 62 | 1 | -5.820983  | 0.700200  | -2.567815 |
| 63 | 6 | -9.468927  | -2.329600 | 1.971189  |
| 64 | 1 | -8.059054  | -2.292255 | 3.597876  |
| 65 | 1 | -10.628717 | -2.137850 | 0.167328  |
| 66 | 1 | -9.095431  | 3.796096  | -0.526007 |
| 67 | 6 | -7.891336  | 3.394921  | -2.266068 |
| 68 | 1 | -6.585212  | 2.675139  | -3.818491 |
| 69 | 6 | -10.487054 | -3.172329 | 2.694926  |
| 70 | 1 | -10.326798 | -4.236522 | 2.489504  |
| 71 | 1 | -10.422719 | -3.035500 | 3.776288  |
| 72 | 1 | -11.503774 | -2.929562 | 2.379253  |
| 73 | 6 | -8.342760  | 4.617726  | -3.021765 |
| 74 | 1 | -9.397281  | 4.834250  | -2.836705 |
| 75 | 1 | -7.770582  | 5.499016  | -2.711641 |
| 76 | 1 | -8.202016  | 4.497363  | -4.097522 |
| 77 | 6 | 10.490092  | -3.172196 | -2.690409 |
| 78 | 1 | 10.328600  | -4.236464 | -2.486344 |
| 79 | 1 | 10.427958  | -3.034289 | -3.771769 |

|    |   |           |           |           |
|----|---|-----------|-----------|-----------|
| 80 | 1 | 11.506376 | -2.930511 | -2.372534 |
| 81 | 6 | 8.339473  | 4.618710  | 3.022849  |
| 82 | 1 | 9.393719  | 4.836310  | 2.837526  |
| 83 | 1 | 7.766333  | 5.499578  | 2.713295  |
| 84 | 1 | 8.199194  | 4.497777  | 4.098607  |

**1b<sup>+</sup>-PF<sub>6</sub><sup>-</sup> with the 6-311++G(d,p) basis set**

| Center Number | Atomic Number | Coordinates (Å) |           |           |
|---------------|---------------|-----------------|-----------|-----------|
|               |               | X               | Y         | Z         |
| 1             | 8             | 0.003084        | 1.479982  | -0.124256 |
| 2             | 7             | -1.137689       | -0.520887 | -0.275158 |
| 3             | 7             | 1.150263        | -0.519282 | -0.247241 |
| 4             | 6             | 0.005093        | 0.261997  | -0.206241 |
| 5             | 1             | -1.02405        | -1.533396 | -0.33483  |
| 6             | 1             | 1.039747        | -1.532245 | -0.306661 |
| 7             | 6             | 2.465836        | -0.0939   | -0.170346 |
| 8             | 6             | 3.462513        | -1.097711 | -0.175869 |
| 9             | 6             | 2.865725        | 1.257024  | -0.088514 |
| 10            | 6             | 4.797399        | -0.768204 | -0.102724 |
| 11            | 1             | 3.16302         | -2.138395 | -0.218932 |
| 12            | 1             | 2.116733        | 2.032987  | -0.096504 |
| 13            | 6             | 4.20808         | 1.577547  | -0.015687 |
| 14            | 6             | 5.204428        | 0.580886  | -0.020096 |
| 15            | 1             | 5.539734        | -1.555514 | -0.089262 |
| 16            | 1             | 4.498416        | 2.619329  | 0.03077   |
| 17            | 7             | 6.562695        | 0.91811   | 0.056694  |
| 18            | 6             | 6.984643        | 2.065735  | 0.787987  |
| 19            | 6             | 7.545682        | 0.1152    | -0.591689 |
| 20            | 6             | 6.474027        | 2.32354   | 2.066301  |
| 21            | 6             | 7.931403        | 2.942998  | 0.246273  |
| 22            | 6             | 8.724762        | -0.238075 | 0.074494  |
| 23            | 6             | 7.353561        | -0.320288 | -1.908745 |
| 24            | 1             | 5.755072        | 1.641427  | 2.503781  |
| 25            | 6             | 6.896255        | 3.442324  | 2.774759  |
| 26            | 6             | 8.350717        | 4.052944  | 0.970835  |
| 27            | 1             | 8.33599         | 2.751783  | -0.740285 |
| 28            | 1             | 8.884994        | 0.093879  | 1.093145  |
| 29            | 6             | 9.683998        | -1.013448 | -0.566998 |
| 30            | 6             | 8.31729         | -1.102858 | -2.533457 |
| 31            | 1             | 6.452449        | -0.039173 | -2.440304 |
| 32            | 1             | 6.494427        | 3.618997  | 3.767167  |
| 33            | 6             | 7.839888        | 4.33024   | 2.244334  |
| 34            | 1             | 9.084294        | 4.721552  | 0.532152  |
| 35            | 1             | 10.589508       | -1.279862 | -0.031704 |
| 36            | 6             | 9.49965         | -1.467595 | -1.878175 |
| 37            | 1             | 8.151131        | -1.425813 | -3.555987 |
| 38            | 6             | -2.455303       | -0.097374 | -0.240049 |
| 39            | 6             | -2.859737       | 1.251791  | -0.150302 |
| 40            | 6             | -3.449876       | -1.101708 | -0.298012 |
| 41            | 6             | -4.204157       | 1.569856  | -0.115954 |
| 42            | 1             | -2.111678       | 2.026391  | -0.090177 |
| 43            | 6             | -4.786767       | -0.774689 | -0.263995 |
| 44            | 1             | -3.147827       | -2.139201 | -0.38132  |



|    |    |            |           |           |
|----|----|------------|-----------|-----------|
| 45 | 6  | -5.198534  | 0.57243   | -0.170173 |
| 46 | 1  | -4.496754  | 2.608257  | -0.02759  |
| 47 | 1  | -5.528211  | -1.560675 | -0.323136 |
| 48 | 7  | -6.55896   | 0.90585   | -0.129204 |
| 49 | 6  | -7.502056  | 0.024492  | 0.476054  |
| 50 | 6  | -7.023771  | 2.131056  | -0.688198 |
| 51 | 6  | -7.233564  | -0.560721 | 1.719652  |
| 52 | 6  | -8.717004  | -0.257412 | -0.158784 |
| 53 | 6  | -7.93621   | 2.928697  | 0.012419  |
| 54 | 6  | -6.591067  | 2.546958  | -1.953408 |
| 55 | 6  | -8.158671  | -1.418888 | 2.301952  |
| 56 | 1  | -6.303487  | -0.337489 | 2.22827   |
| 57 | 6  | -9.6367    | -1.110444 | 0.440769  |
| 58 | 1  | -8.936074  | 0.190777  | -1.120399 |
| 59 | 1  | -8.28072   | 2.615275  | 0.990472  |
| 60 | 6  | -8.397991  | 4.115866  | -0.544202 |
| 61 | 6  | -7.054866  | 3.741092  | -2.492986 |
| 62 | 1  | -5.899804  | 1.928616  | -2.513212 |
| 63 | 6  | -9.376344  | -1.713723 | 1.676795  |
| 64 | 1  | -7.932945  | -1.858631 | 3.267892  |
| 65 | 1  | -10.571353 | -1.319397 | -0.069372 |
| 66 | 1  | -9.103585  | 4.720546  | 0.016258  |
| 67 | 6  | -7.964572  | 4.550649  | -1.802378 |
| 68 | 1  | -6.713376  | 4.040942  | -3.478399 |
| 69 | 6  | -10.360377 | -2.670366 | 2.302179  |
| 70 | 1  | -10.133744 | -3.704159 | 2.018954  |
| 71 | 1  | -10.328942 | -2.618093 | 3.392945  |
| 72 | 1  | -11.382451 | -2.459261 | 1.980292  |
| 73 | 6  | -8.442077  | 5.858164  | -2.383369 |
| 74 | 1  | -9.449483  | 6.103553  | -2.039787 |
| 75 | 1  | -7.78476   | 6.682544  | -2.085202 |
| 76 | 1  | -8.452887  | 5.828807  | -3.475277 |
| 77 | 6  | 10.525749  | -2.342581 | -2.553611 |
| 78 | 1  | 10.294602  | -3.402937 | -2.403418 |
| 79 | 1  | 10.553442  | -2.165398 | -3.631284 |
| 80 | 1  | 11.526618  | -2.166121 | -2.153689 |
| 81 | 6  | 8.272309   | 5.556218  | 3.009269  |
| 82 | 1  | 9.289518   | 5.853642  | 2.744984  |
| 83 | 1  | 7.615556   | 6.405774  | 2.791323  |
| 84 | 1  | 8.237086   | 5.385987  | 4.087758  |
| 85 | 15 | -0.00817   | -4.303937 | 0.178275  |
| 86 | 9  | 1.173519   | -3.354396 | -0.560933 |
| 87 | 9  | -1.143088  | -3.351849 | -0.627937 |
| 88 | 9  | -0.042412  | -3.183973 | 1.389268  |
| 89 | 9  | -1.20143   | -5.138178 | 0.880469  |
| 90 | 9  | 1.140181   | -5.140683 | 0.94841   |
| 91 | 9  | 0.027379   | -5.307472 | -1.088812 |

---

**Table S2:** Selected vertical excitation energies for MV species predicted by TD-DFT.

| <b>1a<sup>+</sup>-PF<sub>6</sub><sup>-</sup> with the 6-311++G(d,p) basis set in the gas phase</b> |          |        |         |                         |              |
|----------------------------------------------------------------------------------------------------|----------|--------|---------|-------------------------|--------------|
| #                                                                                                  | <i>f</i> | eV     | nm      | transition <sup>a</sup> | coefficients |
| 1                                                                                                  | 0.6739   | 0.6777 | 1829.55 | 210β → 211β             | 1.06221      |
| 2                                                                                                  | 0.0138   | 1.5565 | 796.57  | 209β → 211β             | 0.99133      |
| 3                                                                                                  | 0.0774   | 1.8280 | 678.24  | 208β → 211β             | 0.99207      |
| 4                                                                                                  | 0.0459   | 2.1119 | 587.07  | 207β → 211β             | 0.75199      |
| 5                                                                                                  | 0.0574   | 2.1123 | 586.96  | 206β → 211β             | 0.75172      |

<sup>a</sup> Main contributions (> 0.75) are shown. Total number of states in the calculation: 30.

| <b>1b<sup>+</sup>-PF<sub>6</sub><sup>-</sup> with the 6-311++G(d,p) basis set in gas phase</b> |          |        |         |                         |              |
|------------------------------------------------------------------------------------------------|----------|--------|---------|-------------------------|--------------|
| #                                                                                              | <i>f</i> | eV     | nm      | transition <sup>a</sup> | coefficients |
| 1                                                                                              | 0.6589   | 0.7104 | 1745.31 | 194β → 195β             | 1.05490      |
| 2                                                                                              | 0.0140   | 1.6550 | 749.14  | 193β → 195β             | 0.98936      |
| 3                                                                                              | 0.0835   | 1.9245 | 644.25  | 192β → 195β             | 0.98950      |
| 4                                                                                              | 0.0029   | 2.2265 | 556.85  | 191β → 195β             | 0.80406      |
| 5                                                                                              | 0.0054   | 2.2297 | 556.05  | 190β → 195β             | 0.80098      |

<sup>a</sup> Main contributions (> 0.80) are shown. Total number of states in the calculation: 30.

### 3. Electrochemical investigation

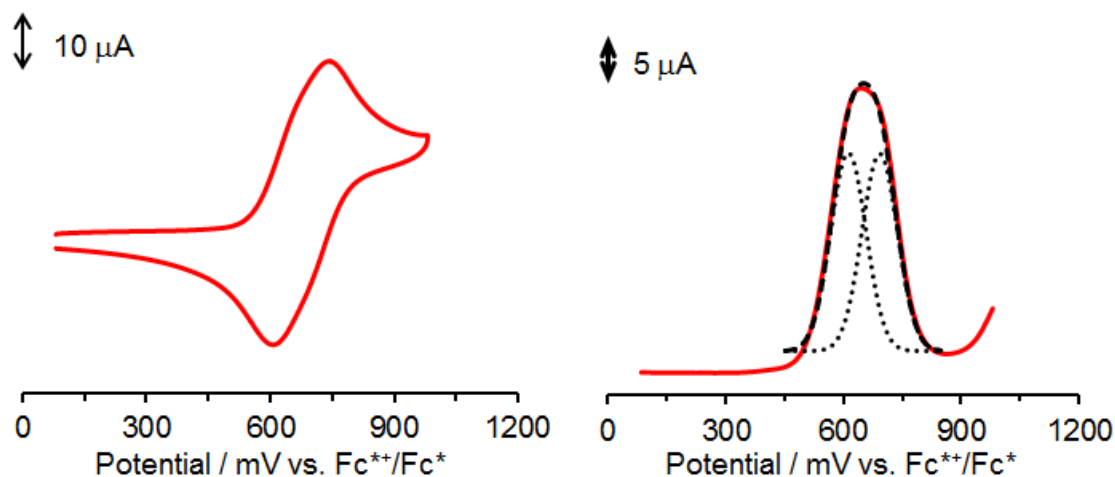

**Figure S9:** Cyclic voltammograms (left) and differential pulse voltammograms (right) of **1a** (1.0 mM) in MeCN/CH<sub>2</sub>Cl<sub>2</sub> 9:1 containing *n*-Bu<sub>4</sub>NPF<sub>6</sub> (0.10 M). Scan rate: 100 mV s<sup>-1</sup>. For the differential pulse voltammogram, Gaussian deconvolution (black dotted line) and the sum (black dashed line) are also shown.

**Table S3:** Electrochemical data for **1a** and **MeO-TPD**.<sup>a</sup>

| Compounds      | Solvent                                    | $E_{1/2}^1$ | $E_{1/2}^2$ | $\Delta E_{1/2}^b$ | $K_c^c$            |
|----------------|--------------------------------------------|-------------|-------------|--------------------|--------------------|
| <b>1a</b>      | MeCN/CH <sub>2</sub> Cl <sub>2</sub> (9/1) | 631         | 712         | 81                 | 23                 |
| <b>MeO-TPD</b> | MeCN/CH <sub>2</sub> Cl <sub>2</sub> (9/1) | 679         | 837         | 158                | 469                |
|                | CH <sub>2</sub> Cl <sub>2</sub>            | 663         | 890         | 227                | $1.94 \times 10^4$ |

<sup>a</sup>In the presence of 0.1M *n*-Bu<sub>4</sub>NPF<sub>6</sub>. Potentials in mV vs. Fc<sup>\*+</sup>/Fc\* (Fc\* = decamethylferrocene). <sup>b</sup> $\Delta E_{1/2}$  = potential difference between two redox processes.

<sup>c</sup>Comproportionation constants obtained from  $K_c = \exp(\Delta E_{1/2} F/RT)$ .

**Table S4:** Electrochemical data for **1** and **MeO-TPD**.<sup>a</sup>

| Compounds      | Solvent                                    | X <sup>-</sup>                 | $E_{1/2}^1$ | $E_{1/2}^2$ | $\Delta E_{1/2}$ |
|----------------|--------------------------------------------|--------------------------------|-------------|-------------|------------------|
| <b>1a</b>      | CH <sub>2</sub> Cl <sub>2</sub>            | PF <sub>6</sub> <sup>-</sup>   | 46          | 140         | 94               |
|                | CH <sub>2</sub> Cl <sub>2</sub>            | BArF <sub>4</sub> <sup>-</sup> | 56          | 122         | 66               |
|                | MeCN/CH <sub>2</sub> Cl <sub>2</sub> (9/1) | PF <sub>6</sub> <sup>-</sup>   | 119         | 200         | 81               |
| <b>1b</b>      | CH <sub>2</sub> Cl <sub>2</sub>            | PF <sub>6</sub> <sup>-</sup>   | 136         | 280         | 144              |
|                | CH <sub>2</sub> Cl <sub>2</sub>            | BArF <sub>4</sub> <sup>-</sup> | 166         | 273         | 107              |
| <b>Ph1b</b>    | CH <sub>2</sub> Cl <sub>2</sub>            | PF <sub>6</sub> <sup>-</sup>   | 164         | -           | -                |
| <b>MeO-TPD</b> | CH <sub>2</sub> Cl <sub>2</sub>            | PF <sub>6</sub> <sup>-</sup>   | 103         | 330         | 227              |
|                | MeCN/CH <sub>2</sub> Cl <sub>2</sub> (9/1) | PF <sub>6</sub> <sup>-</sup>   | 167         | 325         | 158              |

<sup>a</sup>In the presence of 0.1 M *n*-Bu<sub>4</sub>NX. Potentials in mV vs. Fc<sup>+</sup>/Fc. In CH<sub>2</sub>Cl<sub>2</sub>, the Fc<sup>+</sup>/Fc couples are 560 and 618 mV vs Fc<sup>\*+</sup>/Fc\*, and 664 and 568 mV vs Ag/AgCl in CH<sub>2</sub>Cl<sub>2</sub> containing *n*-Bu<sub>4</sub>NPF<sub>6</sub> and *n*-Bu<sub>4</sub>NBArF<sub>4</sub>, respectively. In MeCN/CH<sub>2</sub>Cl<sub>2</sub> 9:1, the Fc<sup>+</sup>/Fc couples are 512 mV vs Fc<sup>\*+</sup>/Fc\* and 435 mV vs Ag/AgCl.

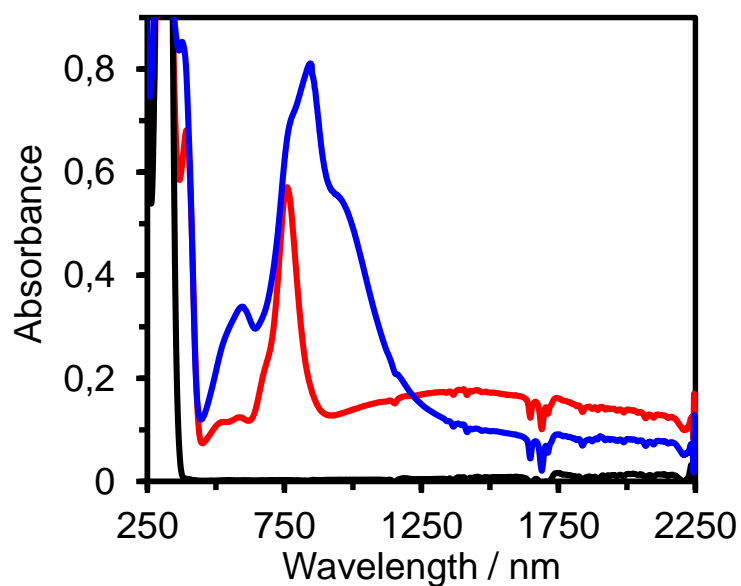

**Figure S10:** UV-vis-NIR spectra of a  $\text{CH}_2\text{Cl}_2$  solution containing **1b** ( $4.5 \times 10^{-4}$  M) and  $n\text{-Bu}_4\text{NPF}_6$  (0.10 M) before and after the controlled potential electrolysis (at 20 mV (black), 755 mV (red), and 1029 mV (blue) vs.  $\text{Fc}^{*+}/\text{Fc}^*$ , respectively).

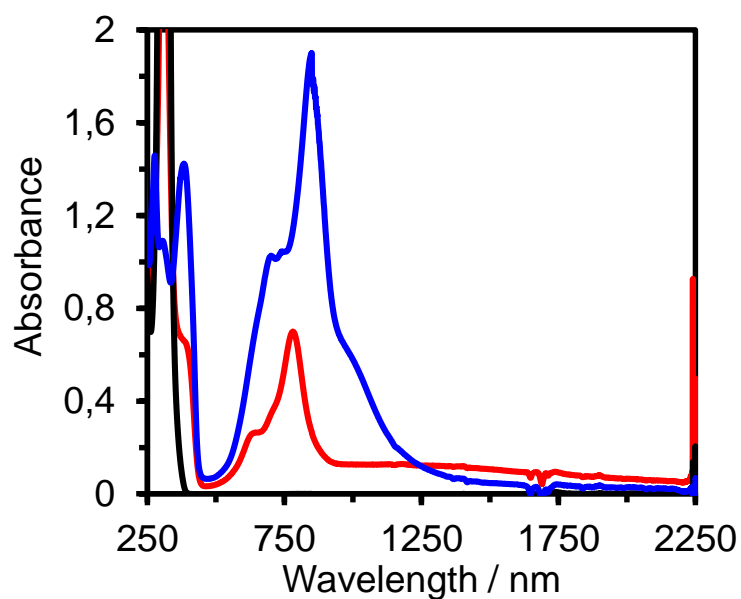

**Figure S11:** UV-vis-NIR spectra of a  $\text{CH}_2\text{Cl}_2$  solution containing **1a** ( $4.3 \times 10^{-4}$  M) and  $n\text{-Bu}_4\text{NPF}_6$  (0.10 M) before and after the controlled potential electrolysis (at 33 mV (black), 642 mV (red), and 779 mV (blue) vs.  $\text{Fc}^{*+}/\text{Fc}^*$ , respectively).

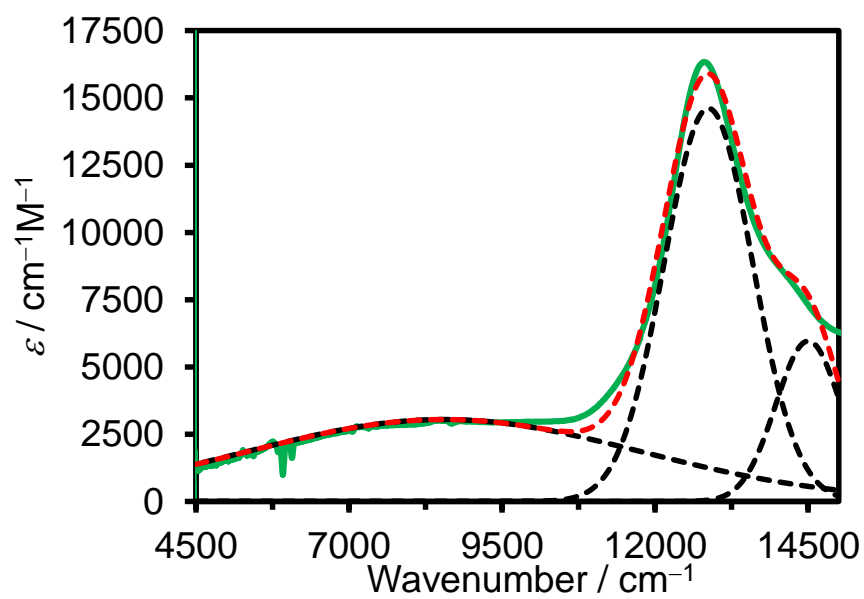

**Figure S12:** Vis-NIR spectra of  $1\mathbf{a}^+$  (green line) prepared by bulk electrolysis, with Gaussian deconvolutions (black broken lines) and the sum (red broken line).
